# Supplementary material for: Endogenous Oxytocin Levels in Autism—A Meta-Analysis
Source: MDPI journal article supplement (doi:10.3390/brainsci11111545), 2021-11-21
Supplement: s1 [file s1]

## Supplementary

A two-factor subgroup interaction of age and sex revealed (marginally) lower OT levels in boys ( $n=595$ ;  $g = -0.60$ ;  $Z = 1.75$ ;  $p = 0.08$ ;  $CI = [-1.27, 0.07]$ ) and mixed boys/girls ( $n = 416$ ;  $g = -0.84$ ;  $Z = 1.93$ ;  $p = 0.05$ ;  $CI = [-1.69, 0.01]$ ) groups of children with ASD but not in girls with ASD ( $n = 112$ ;  $g = -0.13$ ;  $Z = 0.63$ ;  $p = 0.53$ ;  $CI = [-0.55, 0.28]$ ) (Figure S1).

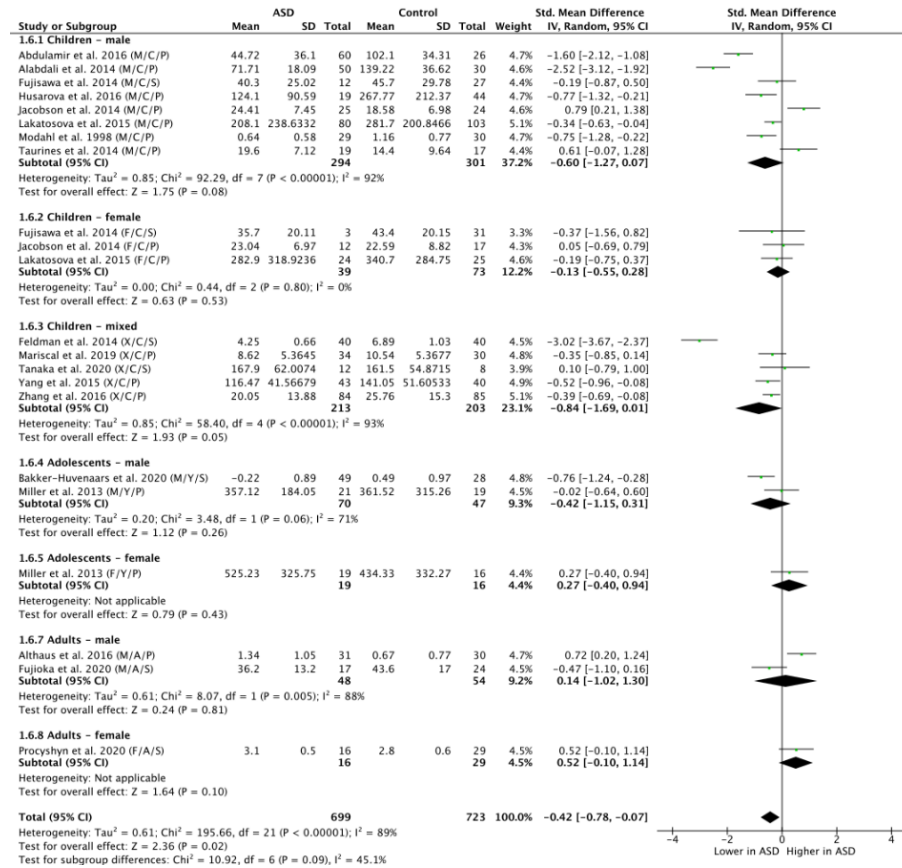

**Figure S1.** Subgroup analysis by age and sex.

M = male, F = female, X = mixed sexes; C = children, Y = youths/adolescents, A = adults; P = plasma, S = saliva.
